# Supplementary material for: Expression of Spred2 in the urothelial tumorigenesis of the urinary bladder
Source: PubMed Central journal article supplement (PMC8612556; doi:10.1371/journal.pone.0254289), 2021-11-24

Fig S1

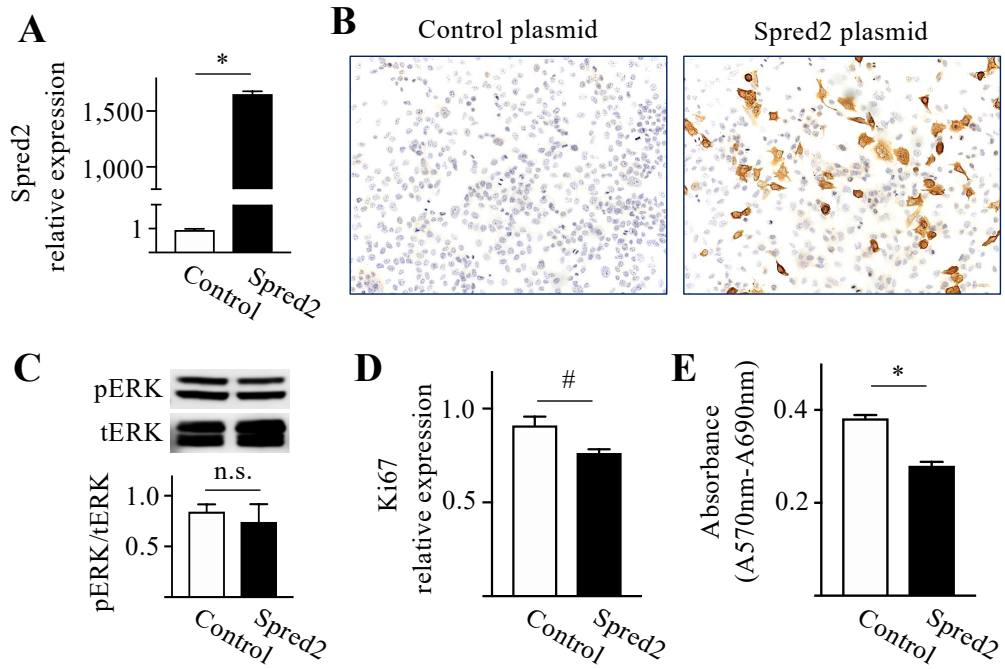

Supplement: pone.0254289.s001.pdf [file pone.0254289.s001.pdf]
